# Supplementary material
Source: publisher site journal article supplement (https://www.spandidos-publications.com/4256/downloadSupplementary)
Supplement: Supplementary file 1 [file downloadSupplementary]

## Sheet: Sheet1
Table SIV. Differentially expressed tsRNAs in patients and healthy participants.
AccID	P1(TPM)	P2(TPM)	P3(TPM)	N1(TPM)	N2(TPM)	N3(TPM)
tsRNA-12383	1444.78	1286.51	1873.32	2102.6	5664.04	15241.7
tsRNA-12384	1443.92	1294.77	1859.25	2108.79	5614.5	15251.3
tsRNA-00621	1452.04	1290.82	1880.79	2071.39	5660.87	15245.5
tsRNA-12402	3250.6	1818.85	1296.54	3246.04	3582.24	10594
tsRNA-14780	8926.08	11799.1	5993.41	5709.67	2386.82	4038.76
tsRNA-14779	8921.93	11824.7	5979.03	5713.77	2388.02	4040.07
tsRNA-14787	8955.06	11848.6	6036.01	5772.66	2399.18	4047.91
tsRNA-00624	3259.76	1852.15	1288.82	3244.36	3573.83	10610.8
tsRNA-05001	8875.2	11779.3	5971.72	5693.86	2403.48	4000.94
tsRNA-14783	8917.44	11815	5999.2	5758.78	2396.61	4016.98
tsRNA-14785	8953.39	11850	6006.51	5741.13	2417.39	4068.67
tsRNA-14789	8925.62	11859.4	6000.89	5762.04	2430.44	4018.8
tsRNA-14786	8962.15	11827	5985.38	5764.88	2404.77	4036.01
tsRNA-14777	8887.88	11811.7	5920.28	5680.9	2386.65	4042.25
tsRNA-14778	8878.95	11784.9	5966.09	5688.43	2402.02	4033.61
tsRNA-14781	8852.16	11811.6	5953.87	5704.07	2379.52	4033.32
tsRNA-14784	8956.96	11810.9	5965.45	5763.88	2397.72	4033.9
tsRNA-14782	8898.02	11820.1	5957.57	5736.53	2405.54	4055.97
tsRNA-14788	8921.64	11772	6008.04	5789.06	2416.87	4016.77
tsRNA-05000	8802.09	11715.7	5866.2	5674.96	2392.83	4032.96
tsRNA-20212	3009.41	1680.61	1263.75	3003.78	3302.82	10134.6
tsRNA-14776	8749.25	11631.2	5881.22	5704.57	2381.84	4029.04
tsRNA-12399	3023.24	1682.69	1279.98	2982.45	3297.84	10136.8
tsRNA-12398	3023.24	1676.25	1274.6	2999.18	3289.16	10106.2
tsRNA-00623	3039.43	1662.11	1265.03	2988.97	3281.78	10091.4
tsRNA-12400	3234.76	1817.24	1341.62	3115.29	3320.16	10170.9
tsRNA-12401	3318.82	1901.3	1339.29	3243.02	3320.94	10143
tsRNA-12403	3940.87	2392.08	1472.13	3681.28	3666.74	10605.1
tsRNA-12404	4219.11	2592.35	1525.58	3957.08	3716.03	10690.5
tsRNA-12405	4392.31	2715.31	1597.83	4036.46	3744.2	10680.5
tsRNA-12406	4447.17	2746.17	1627.24	4090.25	3751.33	10699.5
tsRNA-12407	4509.86	2753.5	1627.96	4126.98	3752.53	10741.6
tsRNA-12411	4545	2788.51	1659.63	4184.86	3750.9	10728.1
tsRNA-12408	4531.06	2755.11	1648.05	4108.99	3744.71	10720.9
tsRNA-12412	4562.69	2770.85	1656.89	4165.04	3766.78	10698.3
tsRNA-04990	293.566	339.395	631.512	742.161	2331.09	3087.42
tsRNA-12410	4550.42	2808.98	1650.22	4174.41	3747.03	10711.4
tsRNA-12409	4549.27	2798.85	1640.74	4158.26	3730.46	10692.1
tsRNA-14698	301.69	336.226	639.066	746.177	2351.44	3050.4
tsRNA-14699	345.999	401.32	666.069	877.761	2374.11	3109.57
tsRNA-24292	345.25	354.357	238.766	392.496	1259.32	2525.29
tsRNA-06176	1031.83	841.136	1136.29	2457.7	1771.63	2776.05
tsRNA-14937	1025.67	846.954	1143.84	2460.04	1748.19	2742.14
tsRNA-14936	974.732	774.899	1086.14	2358.91	1649.52	2596.44
tsRNA-06958	977.152	2099.8	173.75	517.806	179.559	106.576
tsRNA-24281	127.913	105.46	176.081	129.995	917.974	1323.05
tsRNA-14935	948.861	737.182	1060.1	2281.78	1634.15	2462.56
tsRNA-23896	125.435	103.642	190.305	129.744	907.068	1326.82
tsRNA-01471	130.333	103.486	187.734	131.166	896.248	1315.06
tsRNA-24289	145.544	111.798	193.118	148.901	925.96	1325.15
tsRNA-24284	144.507	107.642	196.735	148.733	913.079	1322.61
tsRNA-24291	156.837	131.851	195.609	165.38	926.647	1362.47
tsRNA-01472	147.619	111.019	193.681	151.745	905.007	1322.32
tsRNA-24285	150.038	112.214	199.628	148.148	922.611	1327.11
tsRNA-24282	143.873	110.396	193.681	143.547	903.376	1316.3
tsRNA-24287	147.1	114.967	200.11	154.589	924.157	1310.27
tsRNA-24283	142.606	111.123	192.797	147.311	917.888	1283.63
tsRNA-24286	149.405	114.448	194.404	151.41	923.47	1293.57
tsRNA-24288	150.845	115.902	198.663	144.551	914.281	1305.77
tsRNA-24290	150.269	115.435	196.413	148.733	901.229	1294.95
tsRNA-04140	469.533	1510.37	188.377	346.905	125.889	66.8638
tsRNA-13505	2347.2	2842.13	182.269	1002.9	993.112	528.885
tsRNA-13506	2381.14	2825.4	180.26	1010.43	985.641	545.655
tsRNA-13510	2368.75	2828.52	180.581	1026.91	986.586	538.904
tsRNA-13507	2370.42	2824.41	185.162	1022.4	995.516	536.58
tsRNA-13503	2339.6	2820.98	174.473	1013.28	985.126	533.168
tsRNA-13502	2299.21	2768.88	168.928	973.543	963.915	527.07
tsRNA-13509	2361.09	2820.72	180.019	1021.73	994.4	550.447
tsRNA-13508	2355.21	2805.55	176.322	1031.01	987.96	531.353
tsRNA-13504	2339.08	2813.24	173.83	1019.55	1007.71	549.576
tsRNA-13501	2274.09	2742.54	177.125	991.528	978.256	531.063
tsRNA-25173	2265.56	2731.11	166.678	979.064	984.611	526.997
tsRNA-13500	2156.95	2613.65	155.025	941.588	923.384	499.047
tsRNA-12945	571.633	952.259	465.959	385.385	107.426	72.7444
tsRNA-24310	152.286	167.074	158.4	190.727	466.715	1132.55
tsRNA-12363	741.838	358.513	1090.48	919.086	1344.59	2142.4
tsRNA-14049	329.462	1000.37	181.947	223.518	74.7088	50.6016
tsRNA-12362	639.565	307.653	1024.34	853.586	1240.94	1960.61
tsRNA-10282	92.9386	81.7706	137.103	82.481	525.71	784.361
tsRNA-01470	117.369	100.733	170.214	121.797	491.618	919.105
tsRNA-23895	123.476	102.759	173.509	129.326	482.602	928.688
tsRNA-24280	123.419	96.109	179.938	124.976	483.46	927.89
tsRNA-01469	123.534	94.6544	174.152	121.128	476.247	916.056
tsRNA-24279	120.595	96.4727	169.571	123.052	466.2	907.635
tsRNA-23894	123.246	94.4986	173.509	122.718	478.394	897.18
tsRNA-10283	117.772	105.876	146.988	98.7095	534.812	793.799
tsRNA-00051	290.282	818.693	183.555	192.651	73.0772	48.351
tsRNA-09713	101.351	169.568	74.1773	203.777	313.519	796.05
tsRNA-00041	327.042	659.776	219.157	179.685	61.3986	36.8078
tsRNA-09712	68.1626	114.811	66.623	153.669	209.185	632.774
tsRNA-06957	479.559	913.659	53.1216	315.285	112.149	63.4517
tsRNA-00053	72.3688	115.019	64.0513	156.68	199.309	629.798
tsRNA-09435	19.6479	28.4691	14.064	64.3285	171.315	324.591
tsRNA-15242	877.472	825.395	889.083	631.908	385.824	240.448
tsRNA-09434	17.5736	28.573	12.7781	58.1382	173.462	313.701
tsRNA-17844	845.666	809.29	863.848	621.619	373.286	235.947
tsRNA-20743	817.318	806.225	845.444	604.219	371.054	233.261
tsRNA-06214	35.8963	52.6781	43.0759	43.5827	247.226	400.965
tsRNA-03362	159.776	427.711	192.957	95.698	35.0359	48.1332
tsRNA-03363	154.648	434.257	185.162	99.546	31.1716	47.3347
tsRNA-24278	93.7453	76.2119	129.469	95.0288	324.855	564.386
tsRNA-03361	154.014	428.231	185.403	95.3634	32.8891	50.3838
tsRNA-09436	49.2062	57.4576	23.0649	111.174	202.229	337.005
tsRNA-09443	54.8528	61.0942	25.4758	118.284	217.085	339.183
tsRNA-09714	154.014	278.612	121.271	242.089	334.472	811.296
tsRNA-09437	47.5929	58.7564	23.3863	105.904	209.7	325.68
tsRNA-09445	56.5237	62.9644	26.4402	119.706	215.625	339.401
tsRNA-01468	97.2024	75.5365	134.934	95.5307	315.237	564.023
tsRNA-23893	94.9552	78.9133	137.666	98.7931	310.17	569.758
tsRNA-09444	59.6351	61.0422	25.8777	118.786	212.448	338.022
tsRNA-09439	49.7247	62.7047	24.19	105.067	209.442	333.085
tsRNA-09442	56.927	61.1461	24.5918	109.584	209.013	339.546
tsRNA-09440	50.7043	60.1591	23.8685	105.151	204.719	328.947
tsRNA-09438	50.1281	59.7954	23.6274	106.155	197.334	327.495
tsRNA-09441	54.5071	62.5488	24.3507	115.105	203.689	326.551
tsRNA-21608	40.1025	54.8081	51.7553	44.5029	212.791	392.471
tsRNA-09715	177.811	324.641	141.363	274.044	352.677	831.188
tsRNA-24309	95.4738	92.6283	121.432	123.47	218.373	555.674
tsRNA-19736	60.9027	62.9644	20.011	180.689	180.074	232.027
tsRNA-21609	55.6594	70.0297	62.685	55.0431	222.581	391.89
tsRNA-07656	63.8413	239.337	106.966	40.2367	10.1329	9.36529
tsRNA-12958	258.304	430.257	162.177	174.415	69.0413	44.6485
tsRNA-07655	64.2446	238.039	102.305	43.4154	7.21326	10.0187
tsRNA-14259	226.037	479.662	139.514	123.052	99.8694	66.4282
tsRNA-07658	60.6146	238.974	101.743	44.5029	9.44594	8.4941
tsRNA-07654	59.6351	231.909	93.1435	39.6511	8.50135	8.13111
tsRNA-07657	63.2651	238.506	99.9746	45.5904	8.84484	9.72829
tsRNA-09716	204.315	356.642	154.302	287.429	340.827	817.83
tsRNA-21611	63.7836	88.784	63.8905	61.7352	217.257	398.932
tsRNA-21610	62.6889	82.394	66.0604	60.8987	211.675	390.946
tsRNA-10281	63.6684	41.9763	88.6431	57.7199	232.885	337.586
tsRNA-17841	385.756	324.641	292.369	226.614	120.65	74.7771
tsRNA-19602	358.214	315.29	260.223	202.689	118.847	74.0511
tsRNA-19737	79.6287	95.0181	24.9937	196.499	178.357	226.146
tsRNA-12954	180.403	298.094	156.552	140.619	48.5178	31.9436
tsRNA-15107	23.7964	40.7295	31.8247	30.6167	113.008	240.303
tsRNA-19738	100.083	106.863	29.5745	222.682	175.179	227.09
tsRNA-16150	75.8259	297.522	29.253	60.3968	26.6204	15.8266
tsRNA-05071	29.5007	39.3268	30.9407	30.4494	114.554	242.554
tsRNA-20526	64.7055	71.3804	41.9508	84.3213	208.412	227.453
tsRNA-00422	68.4507	70.3414	42.0311	82.23	209.442	223.533
tsRNA-17787	71.8502	80.0043	44.5225	89.675	214.595	228.47
tsRNA-19400	119.385	326.043	39.2183	84.5723	50.8363	30.782
tsRNA-20527	71.5621	78.9133	45.8083	92.8538	206.265	218.886
tsRNA-00423	71.1588	81.407	45.7279	86.7472	206.866	226.582
tsRNA-18594	144.507	341.577	42.5937	96.1163	63.5454	40.0747
tsRNA-16486	220.909	380.176	58.3453	153.334	79.0883	51.618
tsRNA-18384	133.387	331.239	41.7097	90.7625	59.5094	37.679
tsRNA-09185	142.606	336.589	42.5937	93.6903	65.177	40.3651
tsRNA-00748	185.301	361.526	48.8622	119.288	80.4623	46.9717
tsRNA-07480	136.959	334.719	40.8256	96.7018	63.8889	37.0256
tsRNA-03999	79.5711	134.812	85.0266	46.5942	19.8365	8.7845
tsRNA-15108	39.4687	51.9508	40.5042	40.4876	116.185	237.98
tsRNA-19735	50.2433	48.7299	20.2521	148.817	110.346	112.892
tsRNA-04002	260.147	131.332	263.277	149.068	94.8888	46.8265
tsRNA-24277	25.3521	24.4688	63.4887	37.5598	129.581	191.008
tsRNA-03980	166.633	181.464	149.48	91.1808	68.8695	33.4682
tsRNA-15110	44.1934	65.4581	37.4503	41.7424	118.332	251.701
tsRNA-24294	20.0512	20.3128	61.5599	31.3695	117.559	180.336
tsRNA-24293	19.5327	20.1569	59.8723	27.1033	119.105	178.667
tsRNA-15109	45.7491	62.393	40.6649	38.48	118.16	242.554
tsRNA-19739	152.458	144.943	40.022	250.454	190.636	238.198
tsRNA-15111	52.7785	67.64	39.4594	45.0885	115.927	250.903
tsRNA-10280	44.251	30.599	79.8833	40.2367	169.426	185.926
tsRNA-04091	103.425	201.985	107.127	66.9217	58.5648	36.2996
tsRNA-24295	32.0359	31.3264	72.8915	39.2328	129.581	183.022
tsRNA-24276	20.2817	19.014	56.8184	31.0349	103.133	151.514
tsRNA-20796	31.2292	48.9896	23.0649	71.0206	102.875	121.458
tsRNA-01467	19.3022	18.3386	56.9791	26.0995	106.997	147.667
tsRNA-19734	42.9834	36.6773	16.8767	118.535	88.3625	75.7209
tsRNA-01473	35.4354	32.6771	74.338	42.8299	127.778	185.854
tsRNA-24300	34.1101	33.3524	72.8111	44.1683	125.631	181.643
tsRNA-20795	30.1345	46.9116	22.422	71.8572	100.9	113.037
tsRNA-24299	31.863	33.5083	72.4896	41.826	121.337	184.039
tsRNA-24301	34.1678	32.4693	72.2485	41.1568	123.57	183.095
tsRNA-24296	32.3816	33.0927	71.5252	35.2175	126.576	182.369
tsRNA-24302	32.9001	33.9239	72.1682	41.3241	123.141	182.659
tsRNA-24298	33.7644	35.6383	71.4449	39.4838	122.454	186.435
tsRNA-20804	43.041	65.562	25.6366	92.0173	116.872	123.056
tsRNA-20800	40.9667	66.8607	27.2439	91.599	112.321	129.081
tsRNA-24308	42.0039	35.6383	79.6422	49.6893	125.717	190.718
tsRNA-20805	44.0781	63.5359	26.7617	92.4356	115.927	122.765
tsRNA-24297	34.2254	32.8849	75.2221	42.9972	120.049	179.901
tsRNA-20802	44.8848	63.7956	25.2347	86.9982	114.897	127.412
tsRNA-20811	44.1357	64.7827	25.958	89.1731	116.872	123.709
tsRNA-24305	41.1972	36.1058	82.2138	51.697	128.121	186.507
tsRNA-24303	43.3867	36.2617	79.4814	47.4307	128.379	189.919
tsRNA-20808	45.9219	65.8217	25.5562	89.926	111.634	130.315
tsRNA-22304	35.1473	34.4434	75.4632	61.7352	123.999	157.468
tsRNA-20803	42.4648	63.9515	26.8421	88.0857	114.811	120.66
tsRNA-20807	41.7734	68.6271	28.5297	88.8385	114.382	129.009
tsRNA-00350	17.977	16.5204	61.1581	27.7725	94.8029	141.423
tsRNA-20806	41.6582	68.2634	27.5653	84.9069	120.65	123.056
tsRNA-20799	41.7734	66.0815	25.1544	85.5761	114.639	121.386
tsRNA-20810	44.9424	65.562	29.1727	92.0173	116.529	123.201
tsRNA-04923	80.5506	83.5369	117.012	75.7051	19.6647	8.20371
tsRNA-01466	18.3227	17.8191	57.3006	28.7763	92.055	138.011
tsRNA-20801	45.9219	65.1983	28.6905	94.025	116.786	120.224
tsRNA-24306	41.3124	38.3917	82.2942	49.1038	123.742	190.791
tsRNA-20797	44.5967	64.3151	21.5379	88.6712	109.916	117.393
tsRNA-06213	20.5698	23.7935	19.4484	24.8447	55.0441	123.854
tsRNA-24304	43.7324	36.2097	81.8924	46.0087	132.673	179.538
tsRNA-24307	42.9258	35.0668	81.9728	46.2596	130.011	178.812
tsRNA-20798	44.0781	66.3412	27.3243	86.078	110.861	124.798
tsRNA-20809	47.9386	65.8217	23.5471	88.3366	109.745	122.547
tsRNA-11140	121.114	47.3272	122.075	62.1535	31.8586	21.9249
tsRNA-17111	22.0103	47.4831	46.2905	37.4761	73.249	171.552
tsRNA-12915	171.934	155.021	100.376	108.162	63.4596	37.9694
tsRNA-13531	22.2407	18.2867	9.00093	50.4422	79.0883	34.1942
tsRNA-22305	40.9667	45.3531	87.9198	67.0053	122.969	165.236
tsRNA-21607	23.7964	23.7935	28.1279	28.86	54.9582	120.297
tsRNA-15323	20.8579	11.4292	47.1745	76.5417	101.93	31.5806
tsRNA-14070	74.0397	84.2123	37.8521	39.2328	19.4071	10.5995
tsRNA-24328	1.90141	1.09097	1.68767	3.848	22.5844	38.3324
tsRNA-00139	73.0026	83.3291	37.3699	38.8982	17.5179	12.9227
tsRNA-24329	2.53521	2.02608	1.60731	5.01913	23.6149	38.6228
tsRNA-15324	23.5083	13.8709	53.2823	79.9714	107.684	33.4682
tsRNA-24336	2.93854	1.71438	2.49133	4.43356	24.9888	39.5665
tsRNA-24333	3.34187	0.987066	2.00914	5.60469	23.0996	37.0256
tsRNA-24332	3.16902	1.35072	2.57169	4.60087	24.3018	38.768
tsRNA-25048	133.329	47.2233	152.051	68.0928	63.3737	32.6696
tsRNA-24331	3.28425	1.50657	2.3306	5.60469	23.0996	38.8406
tsRNA-07602	36.2996	65.51	22.422	19.6582	9.01658	4.57375
tsRNA-17946	96.9719	41.9243	101.1	54.2066	31.5151	17.932
tsRNA-06226	16.9398	8.26018	45.085	63.4083	96.9497	22.8687
tsRNA-09993	70.4674	85.4072	36.8877	41.7424	20.3517	12.8501
tsRNA-13530	12.8489	15.1177	6.67033	33.0426	60.7975	27.1521
tsRNA-24330	3.62996	1.61048	2.00914	4.09895	22.7561	36.5174
tsRNA-24335	3.80282	1.66243	2.25023	3.59704	24.3018	36.5174
tsRNA-05752	49.6095	71.2246	28.2083	29.1109	13.3961	7.40511
tsRNA-12928	60.0384	77.6665	35.2804	36.8069	16.7451	10.8899
tsRNA-07951	43.6748	113.513	37.3699	49.522	20.7811	8.05851
tsRNA-13295	31.3444	37.3007	60.3544	47.7653	62.6867	153.983
tsRNA-02547	61.4213	49.4572	81.6513	47.4307	18.119	11.9063
tsRNA-23244	38.662	67.4322	22.3416	23.8408	8.75896	6.67912
tsRNA-16253	38.2587	27.2222	100.055	27.7725	23.7007	9.65569
tsRNA-24334	4.20615	1.87023	3.13425	4.85182	23.1855	37.7516
tsRNA-08986	42.5224	31.1705	105.761	33.4608	27.3074	10.0187
tsRNA-11133	83.0858	33.7161	84.9463	44.6702	26.878	13.6486
tsRNA-26382	46.1524	68.8349	25.3955	27.2706	13.7396	6.67912
tsRNA-12925	69.776	57.042	95.4741	54.6248	27.9085	17.206
tsRNA-21938	40.9667	26.1832	104.154	29.1946	25.6758	12.1967
tsRNA-26544	9.44943	7.79263	5.54522	16.6468	53.756	21.9975
tsRNA-06736	92.3048	67.6919	99.5728	74.6177	30.914	20.6182
tsRNA-03435	44.8848	34.6512	106.484	36.556	28.3378	12.2693
tsRNA-05749	53.5276	44.9375	79.4814	42.6626	19.493	10.3091
tsRNA-13193	44.0205	29.3003	110.502	32.457	32.6314	11.3255
tsRNA-14064	93.0538	67.2244	99.4121	74.1994	30.0553	23.4495
tsRNA-01653	45.461	47.0155	23.5471	67.5909	106.739	62.7983
tsRNA-11667	83.3739	36.0019	89.3664	47.2634	28.9389	17.206
tsRNA-04680	47.3048	120.682	44.4421	53.0354	27.6508	15.3184
tsRNA-26535	18.4955	10.1304	49.5855	66.5871	93.8583	20.836
tsRNA-19857	36.242	25.5079	104.716	26.6014	27.4791	12.4871
tsRNA-03982	83.8349	31.3783	76.3472	33.7954	35.0359	13.939
tsRNA-24337	11.178	7.74067	2.73243	13.5516	23.4431	49.9482
tsRNA-07090	41.5429	29.3003	104.716	33.1262	28.6813	11.1077
tsRNA-20775	37.452	56.003	14.7872	69.4312	95.5758	57.7889
tsRNA-11699	37.2791	26.7547	101.823	28.2744	27.3932	11.6885
tsRNA-05764	36.4149	28.8847	106.966	24.2591	28.0802	19.6744
tsRNA-24055	36.242	25.0923	100.216	28.4417	26.6204	10.5269
tsRNA-12425	23.6812	11.3253	13.9836	26.8523	24.9029	79.9317
tsRNA-08665	34.6863	26.0793	100.216	23.3389	27.4791	15.028
tsRNA-26423	36.1844	26.0274	105.761	25.012	27.0497	18.295
tsRNA-02400	1.49808	4.46777	1.20548	10.7075	30.7422	11.7611
tsRNA-13777	28.9821	25.2481	98.2869	24.5101	26.191	10.0913
tsRNA-13348	19.475	17.6633	26.9224	27.7725	35.637	90.8941
tsRNA-07136	66.7222	30.9627	94.5901	59.2257	20.18	7.62291
tsRNA-23022	66.607	32.8849	94.7509	60.5641	19.8365	8.8571
tsRNA-21787	61.1908	33.4044	90.4915	56.2142	18.7201	8.20371
tsRNA-05239	1.09475	3.74046	2.00914	11.2094	28.3378	11.5433
tsRNA-15260	1.32522	3.84436	1.28585	10.7075	26.9639	12.1967
tsRNA-01508	31.7478	25.9235	95.6349	21.7495	24.4736	16.6252
tsRNA-02398	1.20999	3.94826	2.41096	10.7911	28.9389	12.1967
tsRNA-22960	53.9309	25.3001	88.9645	52.9518	13.7396	6.60652
tsRNA-10763	37.0487	27.7417	100.376	29.0273	30.8281	11.4707
tsRNA-15263	1.67094	4.15607	2.3306	12.0459	28.5096	12.5597
tsRNA-04539	28.4059	21.7154	97.7244	20.6621	25.4182	14.5198
tsRNA-23240	35.6658	37.4046	70.2394	32.8753	14.4265	10.5995
tsRNA-21948	25.1217	17.4555	99.5728	20.2438	21.5539	15.4636
tsRNA-20476	4.49424	5.24703	7.47399	4.26626	31.0857	36.0818
tsRNA-05235	1.03713	1.87023	1.44658	5.18643	25.3323	12.2693
tsRNA-13752	57.0999	28.9366	73.8558	32.457	23.4431	13.213
tsRNA-05238	0.921896	4.25997	1.52694	11.7949	25.5899	11.1803
tsRNA-16232	68.105	30.651	78.8385	39.3165	25.1606	16.7704
tsRNA-13570	36.6453	86.2384	25.3151	25.8485	23.4431	12.5597
tsRNA-05179	0.345711	22.235	41.79	11.7113	0	1.81498
tsRNA-09283	1.09475	1.66243	2.16987	4.85182	25.504	13.213
tsRNA-09284	0.806659	2.33779	1.44658	6.52486	25.3323	10.8173
tsRNA-05237	1.03713	2.70144	1.68767	4.76817	27.6508	12.3419
tsRNA-25691	25.9859	20.4686	95.2331	18.989	23.3572	15.754
tsRNA-02397	1.61332	4.25997	2.25023	9.03443	30.3129	11.7611
tsRNA-15258	1.03713	4.88338	1.36621	8.78347	29.1107	11.1803
tsRNA-02561	37.7401	30.651	117.494	27.0196	36.1522	24.6111
tsRNA-20481	5.64661	5.9224	7.95618	5.43739	30.3129	38.6228
tsRNA-15262	1.49808	4.31192	2.00914	11.1257	27.8226	11.2529
tsRNA-09285	1.78617	2.75339	2.65206	6.02295	28.4237	14.0116
tsRNA-15264	1.84379	5.09118	2.00914	13.3007	27.7367	11.3981
tsRNA-20478	4.78233	6.1302	7.79545	5.35373	31.2575	35.7914
tsRNA-14030	49.0909	48.8857	98.528	44.5029	34.0913	17.2786
tsRNA-17890	40.8515	54.7042	84.8659	47.3471	24.0442	13.6486
tsRNA-26380	49.9552	44.2102	73.3737	42.9972	21.4681	11.9063
tsRNA-11835	26.1588	18.2867	90.9737	18.3198	20.9528	16.0444
tsRNA-02394	1.26761	2.44169	1.12512	5.10278	25.5899	11.2529
tsRNA-15255	0.230474	2.54559	1.04475	5.35373	24.4736	9.43789
tsRNA-05994	39.2382	41.8204	64.3727	37.9781	15.6287	8.2763
tsRNA-15268	2.30474	4.15607	2.0895	12.6315	26.7921	11.3981
tsRNA-24091	25.4097	18.9101	96.1171	19.0727	23.7007	15.9718
tsRNA-02294	1.15237	1.61048	2.3306	4.60087	26.191	11.6885
tsRNA-00905	1.61332	2.90925	2.49133	7.44504	28.8531	10.8173
tsRNA-15253	0.288092	1.66243	1.68767	4.09895	22.5844	11.7611
tsRNA-10000	51.1076	25.9754	88.0805	52.5335	16.2298	6.89692
tsRNA-05249	1.09475	2.28584	1.84841	6.44121	24.7312	11.1803
tsRNA-02399	1.09475	5.09118	2.00914	10.1219	28.252	11.0351
tsRNA-15257	0.921896	4.15607	2.97352	10.2892	26.191	12.5597
tsRNA-05240	2.53521	5.40289	4.09864	13.6353	32.4597	11.4707
tsRNA-20483	6.51089	5.9224	7.79545	4.93547	30.914	37.679
tsRNA-00908	3.16902	5.35094	3.69681	13.8026	29.7977	14.0842
tsRNA-02396	0.864277	3.53266	2.3306	6.69217	27.9943	10.8899
tsRNA-15261	1.84379	4.31192	2.49133	10.7075	26.2769	12.7775
tsRNA-19552	1.44046	3.32485	2.3306	6.35756	26.9639	12.8501
tsRNA-16327	20.8003	16.3645	86.7143	17.4833	18.3767	13.576
tsRNA-05120	0.74904	2.18194	1.60731	5.18643	24.3018	10.3091
tsRNA-05173	45.6338	37.1448	99.2513	41.4914	30.7422	16.117
tsRNA-19553	2.53521	5.24703	3.61644	11.544	31.9445	11.6885
tsRNA-05236	1.09475	1.92218	2.00914	5.18643	24.7312	10.7447
tsRNA-09422	1.03713	3.169	1.12512	5.68834	16.4016	19.3114
tsRNA-19551	1.84379	2.49364	1.68767	4.93547	26.9639	11.1803
tsRNA-05118	1.20999	4.67558	2.25023	10.7911	26.5345	10.5269
tsRNA-06921	42.6377	22.0272	78.3563	41.2405	15.6287	5.66273
tsRNA-04870	71.1012	34.3915	70.9627	51.1114	21.5539	12.6323
tsRNA-09288	0.979514	2.44169	2.49133	5.9393	25.7617	10.8173
tsRNA-02395	0.921896	2.75339	2.41096	4.85182	27.2215	10.8173
tsRNA-20482	5.64661	5.24703	9.16166	6.19026	29.1965	36.0818
tsRNA-00907	2.41998	3.169	2.81279	8.0306	27.3074	12.8501
tsRNA-05115	0.806659	1.76633	1.36621	5.10278	22.6703	9.65569
tsRNA-00909	1.5557	2.70144	3.05389	7.61234	26.5345	11.5433
tsRNA-05117	1.32522	4.05217	2.65206	9.61999	26.191	11.3255
tsRNA-15259	1.15237	4.36387	1.84841	8.95077	25.2464	11.2529
tsRNA-20480	5.64661	5.76654	9.72422	4.1826	31.2575	37.316
tsRNA-15256	1.26761	3.3768	1.68767	8.36521	23.7866	10.7447
tsRNA-05116	0.979514	2.9612	1.68767	5.43739	24.4736	11.2529
tsRNA-20479	4.6671	6.85751	8.5991	5.35373	32.2021	33.0326
tsRNA-14048	36.3573	52.0028	19.3681	19.6582	14.083	7.33252
tsRNA-09429	3.16902	5.19508	1.44658	10.2056	19.0636	20.9812
tsRNA-05241	6.10756	9.0914	4.01827	15.9776	38.2131	14.5198
tsRNA-00906	1.78617	3.0651	3.45571	6.35756	29.2824	11.1803
tsRNA-15270	0.633803	2.49364	2.57169	4.76817	25.2464	10.5995
tsRNA-09286	7.77849	9.97456	5.30412	19.7419	38.6425	16.7704
tsRNA-08487	40.7939	39.5865	66.7837	39.6511	17.2603	10.1639
tsRNA-19554	1.67094	2.70144	3.05389	5.27008	27.1356	12.1241
tsRNA-05114	0.576185	2.49364	1.44658	4.68452	24.3877	8.4941
tsRNA-20924	38.6044	47.2233	20.8147	18.2362	13.3102	9.36529
tsRNA-06285	67.1255	34.859	65.096	46.4269	22.4985	11.9789
tsRNA-20484	5.81947	5.97435	9.48312	5.27008	32.4597	34.049
tsRNA-09428	2.76569	4.98728	1.12512	8.95077	18.3767	20.11
tsRNA-09426	2.76569	4.67558	1.28585	8.53251	17.9473	20.2552
tsRNA-19969	27.8297	19.3777	89.1253	22.1678	21.6398	16.9156
tsRNA-20477	5.70423	6.59776	7.79545	4.51721	30.1411	34.1216
tsRNA-04449	2.88092	3.01315	4.82193	7.36138	29.2824	13.8664
tsRNA-22224	4.09091	7.16922	1.28585	13.468	10.4764	30.1287
tsRNA-15955	50.9347	32.9888	70.6412	37.4761	22.7561	13.7212
tsRNA-12696	12.0423	13.5592	19.2877	22.2515	51.8668	33.5408
tsRNA-03923	48.3995	15.1696	92.9025	33.7118	28.5954	13.8664
tsRNA-09427	2.13188	4.62362	2.00914	9.20173	16.7451	19.2388
tsRNA-11486	51.1652	25.3001	62.9261	32.5407	20.4376	11.6885
tsRNA-13430	32.9001	83.5889	9.96532	34.0464	15.1135	6.89692
tsRNA-05070	12.2727	15.0138	15.2694	17.8179	22.6703	62.4353
tsRNA-02401	6.51089	11.0136	5.46485	19.5746	35.0359	16.6252
tsRNA-15254	0.633803	2.44169	2.3306	5.18643	21.7257	9.94608
tsRNA-22367	8.35468	3.84436	84.9463	15.5593	14.6841	8.13111
tsRNA-11434	51.2228	21.4037	58.6668	30.8676	19.2354	11.1077
tsRNA-24327	2.36236	1.61048	1.52694	3.42974	8.58722	24.0303
tsRNA-10520	17.6313	14.9099	1.92877	12.3805	12.0221	63.9599
tsRNA-13854	20.1665	14.9099	83.1782	17.1487	19.5789	15.8266
tsRNA-07596	33.1306	36.7812	62.9261	36.305	15.7146	10.4543
tsRNA-09423	1.32522	3.169	0.964385	5.10278	13.9972	16.3348
tsRNA-13436	23.7964	38.4956	13.421	15.392	7.55675	3.12176
tsRNA-04019	7.77849	2.75339	85.8303	16.4795	14.3407	8.05851
tsRNA-09425	2.36236	5.55874	1.68767	8.86712	15.8005	19.5292
tsRNA-04066	19.0717	52.1586	6.58997	10.0383	10.6482	7.04212
tsRNA-04897	35.2625	15.1696	89.6075	29.1946	24.8171	14.5924
tsRNA-09430	3.62996	5.45484	2.0895	8.11425	17.5179	21.3442
tsRNA-18454	46.9014	20.3128	63.4887	27.7725	21.7257	12.8501
tsRNA-24326	2.82331	1.35072	1.60731	3.01148	8.84484	23.5947
tsRNA-10522	21.9526	20.4686	2.73243	11.7113	18.806	72.3088
tsRNA-18041	12.2727	16.3645	22.422	23.9245	53.3266	34.2668
tsRNA-04804	8.46992	5.35094	54.327	8.36521	9.18833	4.79154
tsRNA-04067	21.7222	55.3796	6.91143	12.2969	13.4819	6.09833
tsRNA-19475	3.51473	4.05217	2.00914	7.02678	22.842	13.5034
tsRNA-26547	9.79514	31.69	4.74156	6.69217	3.00553	1.01639
tsRNA-14063	33.4187	25.352	35.9234	26.936	7.81437	4.21075
tsRNA-04688	26.3316	9.24725	75.3828	25.012	15.2853	9.36529
tsRNA-06166	6.04994	3.89631	53.3627	7.44504	8.67309	3.92035
tsRNA-19477	7.08707	4.31192	51.8357	7.19408	8.50135	4.42855
tsRNA-15199	7.95135	6.1302	10.9297	18.2362	27.6508	24.2481
tsRNA-13710	32.9578	18.2347	69.9179	36.8906	14.8559	5.29974
tsRNA-22569	7.37516	4.05217	49.1033	7.8633	6.35454	4.50115
tsRNA-26328	24.8336	10.4421	76.4275	25.2629	17.5179	8.05851
tsRNA-03896	25.9283	9.71481	76.1864	25.8485	16.2298	8.8571
tsRNA-04349	19.3598	10.4421	49.1837	15.5593	10.1329	4.06555
tsRNA-15106	12.388	16.1048	14.948	18.4035	20.5235	59.2409
tsRNA-02293	0.288092	0.831213	0.642924	2.50956	16.4016	5.08194
tsRNA-04729	15.2689	11.5331	69.3554	16.3122	17.4321	7.33252
tsRNA-00050	35.2049	44.2102	20.5736	19.8255	15.2853	8.5667
tsRNA-09517	23.9117	10.0265	76.3472	24.0082	18.806	7.84071
tsRNA-14853	6.28041	3.68851	47.6567	6.44121	8.24373	3.12176
tsRNA-19550	0.633803	0.675361	0.88402	2.59321	15.457	6.17093
tsRNA-25162	7.54802	4.67558	82.696	19.3236	13.8254	7.98591
tsRNA-04779	8.46992	3.94826	84.0623	16.7304	16.7451	8.8571
tsRNA-12524	5.81947	7.32507	15.5909	15.8939	36.5816	21.0538
tsRNA-20475	3.62996	5.55874	7.95618	3.93165	22.2409	28.2411
tsRNA-20744	8.35468	21.144	28.1279	30.9513	51.1798	33.9764
tsRNA-18826	2.13188	3.53266	4.179	3.09513	16.3157	21.562
tsRNA-04448	0.691422	1.40267	1.20548	3.01148	17.5179	6.09833
tsRNA-19484	41.5429	17.3516	55.1307	26.3504	18.0332	10.2365
tsRNA-22225	9.39181	11.3772	2.0895	17.5669	10.3047	35.7914
tsRNA-13443	7.08707	3.169	80.2047	16.8977	14.6841	7.33252
tsRNA-09424	2.99616	5.45484	1.20548	7.11043	16.6592	16.48
tsRNA-10653	23.7388	51.3274	15.4302	17.4833	13.5678	7.91331
tsRNA-11638	26.7926	9.2992	75.7846	26.5177	18.2049	8.6393
tsRNA-04129	11.0051	13.0916	21.6987	19.0727	49.5483	29.1849
tsRNA-04065	16.2484	49.2494	5.38448	11.0421	9.8753	6.02573
tsRNA-03828	5.9347	2.9612	46.9334	6.52486	7.81437	3.62996
tsRNA-18824	2.65045	3.0651	4.09864	2.42591	14.5124	22.7235
tsRNA-18823	2.01665	3.3768	3.77718	2.00765	16.7451	19.5292
tsRNA-07193	13.6556	30.3393	44.201	19.4073	8.58722	10.4543
tsRNA-20474	3.86044	4.77948	6.58997	2.92782	19.4071	27.0069
tsRNA-15931	2.47759	3.79241	1.84841	25.4302	8.07199	2.25057
tsRNA-09355	6.56851	5.45484	25.5562	6.52486	42.4209	35.4284
tsRNA-05246	7.4904	8.93554	5.70595	14.9737	31.4292	13.8664
tsRNA-05073	1.26761	1.40267	2.00914	4.1826	16.3157	7.69551
tsRNA-12922	25.1793	22.2869	29.0119	21.5822	6.1828	3.77516
tsRNA-16198	24.8336	34.1836	5.38448	7.52869	10.9916	5.59014
tsRNA-02393	0.403329	0.779263	1.20548	2.0913	15.2853	5.00934
tsRNA-15133	1.38284	1.29877	1.60731	3.17878	16.3157	7.25992
tsRNA-15320	2.30474	2.23389	1.60731	19.8255	7.04152	3.84776
tsRNA-05113	0.576185	1.03902	0.964385	2.25861	14.8559	5.37234
tsRNA-10651	23.854	49.5091	13.0996	18.989	12.1939	7.62291
tsRNA-12366	4.49424	5.9224	9.80458	12.7151	32.2879	11.1077
tsRNA-09349	2.1895	3.89631	6.83106	6.60852	20.9528	16.0444
tsRNA-00904	1.15237	0.987066	1.60731	3.01148	16.9168	5.22714
tsRNA-09282	0.806659	1.35072	0.562558	2.50956	13.3102	6.82432
tsRNA-06825	6.45327	4.88338	61.1581	8.53251	15.8005	5.51754
tsRNA-07192	12.2727	29.0925	42.0311	17.7342	9.10245	10.2365
tsRNA-05234	0.345711	1.19487	1.04475	1.75669	14.4265	5.88053
tsRNA-13322	6.39565	4.41582	62.2029	9.70364	15.0276	5.66273
tsRNA-10652	22.7593	52.834	12.7781	19.0727	13.6537	8.13111
tsRNA-19474	1.67094	3.0651	1.36621	5.68834	15.2853	8.8571
tsRNA-06407	4.6671	5.03923	8.43837	11.3767	29.7118	10.6721
tsRNA-05232	2.01665	4.31192	2.65206	11.3767	17.5179	6.60652
tsRNA-04253	3.05378	4.10412	1.12512	25.4302	6.09693	2.61357
tsRNA-23173	10.0832	4.93533	47.3352	13.5516	7.55675	2.90397
tsRNA-07191	10.5442	31.0666	40.1024	16.8141	8.84484	10.8899
tsRNA-13720	23.9693	31.5861	5.46485	6.85947	11.9362	4.42855
tsRNA-15930	2.82331	3.53266	1.60731	25.4302	5.15233	2.83137
tsRNA-19801	28.0026	34.6512	8.19728	10.5402	13.3961	5.66273
tsRNA-19778	1.67094	4.00021	0	17.4833	6.09693	4.86414
tsRNA-01374	1.72855	2.9612	0.88402	19.1563	6.35454	2.68617
tsRNA-04025	18.1498	5.76654	56.1754	17.7342	12.1939	6.02573
tsRNA-10649	20.1665	46.8077	11.653	15.8939	13.7396	5.66273
tsRNA-13975	23.0474	13.1436	60.033	25.4302	15.9722	5.95313
tsRNA-08872	8.06659	7.01336	62.1225	11.2094	16.4875	6.67912
tsRNA-26463	11.1204	7.11726	60.4348	12.7151	16.7451	6.09833
tsRNA-06212	12.3304	14.4423	11.0101	12.9661	34.95	32.234
tsRNA-06242	1.44046	2.54559	1.60731	15.8939	8.41548	3.12176
tsRNA-18828	3.39949	4.31192	5.46485	3.34608	18.0332	20.3278
tsRNA-18825	2.88092	4.67558	3.45571	2.42591	15.7146	19.6744
tsRNA-01441	1.67094	3.58461	0.642924	18.4035	6.95565	2.61357
tsRNA-05004	1.72855	4.20802	2.73243	11.4603	16.3157	5.66273
tsRNA-08671	0.921896	2.80535	0.88402	10.4565	10.3047	4.42855
tsRNA-10648	18.6684	45.3531	13.5014	15.6429	11.9362	7.62291
tsRNA-11627	26.0435	32.9888	6.99179	9.11808	13.0526	5.44494
tsRNA-25273	20.9731	33.9758	12.2959	17.8179	5.66757	4.93674
tsRNA-19783	4.55186	8.15628	1.68767	25.4302	10.047	8.05851
tsRNA-02551	16.8246	21.1959	5.94704	7.69599	3.95012	2.54097
tsRNA-03533	1.95903	3.3768	1.44658	20.5784	6.86978	2.10538
tsRNA-15932	4.03329	3.84436	1.84841	25.2629	7.12739	2.75877
tsRNA-03754	4.14853	2.64949	40.5845	5.77199	7.47088	2.97657
tsRNA-00073	2.30474	2.44169	2.0895	16.5631	10.047	2.97657
tsRNA-12344	5.64661	2.90925	3.69681	5.9393	14.1689	19.5292
tsRNA-14327	2.82331	5.45484	1.52694	20.6621	10.1329	4.42855
tsRNA-18829	3.39949	4.31192	5.54522	4.09895	16.7451	20.473
tsRNA-05751	13.3675	21.3518	5.22375	6.69217	3.60663	1.74238
tsRNA-05230	1.72855	3.68851	3.37535	10.7075	15.457	7.04212
tsRNA-08668	0.691422	2.02608	0.482193	8.44886	9.8753	3.26696
tsRNA-03998	14.9808	21.5076	13.5818	8.95077	6.26867	2.83137
tsRNA-23592	3.57235	3.84436	1.04475	23.7572	6.44042	2.25057
tsRNA-12707	2.88092	3.63656	3.13425	11.0421	17.0027	6.60652
tsRNA-10650	19.936	50.3923	11.3315	16.8977	13.7396	7.98591
tsRNA-08667	0.806659	1.71438	0.401827	7.8633	9.70356	3.12176
tsRNA-19782	3.97567	6.80556	1.84841	23.2553	9.18833	7.33252
tsRNA-10526	12.5032	13.2475	0.88402	6.44121	15.6287	39.9295
tsRNA-05231	1.61332	4.83143	2.81279	10.6238	16.4875	6.46133
tsRNA-04673	0.691422	2.9612	0.642924	7.11043	12.2797	4.28335
tsRNA-05005	2.59283	3.68851	2.89316	10.7911	16.2298	6.09833
tsRNA-19786	4.89757	7.53287	2.0895	25.5139	9.10245	7.84071
tsRNA-19779	2.70807	5.19508	0.401827	18.1525	6.69803	6.60652
tsRNA-07510	7.95135	3.84436	45.5672	12.3805	8.15786	2.61357
tsRNA-12710	11.927	10.7019	17.3589	26.0995	37.4403	17.206
tsRNA-01524	0.864277	1.76633	0.562558	7.27773	10.1329	3.41216
tsRNA-10046	11.927	30.599	6.5096	9.28538	5.40995	3.33956
tsRNA-04674	1.38284	4.83143	1.36621	10.6238	13.0526	6.24353
tsRNA-02637	2.07426	1.92218	1.92877	14.9737	7.81437	3.84776
tsRNA-23593	3.51473	3.48071	1.36621	23.5899	5.49582	2.25057
tsRNA-22611	3.80282	4.20802	2.41096	26.2668	6.35454	2.39577
tsRNA-16662	29.5007	30.4432	21.6987	24.3428	9.78943	5.59014
tsRNA-14793	1.38284	2.59754	1.52694	10.4565	10.047	5.08194
tsRNA-10488	10.3713	17.2477	2.65206	32.5407	24.3877	9.36529
tsRNA-25683	2.70807	4.10412	1.84841	22.1678	6.95565	2.54097
tsRNA-00095	3.22663	4.25997	1.52694	23.9245	6.35454	2.03278
tsRNA-05006	9.79514	10.7538	16.9571	24.761	35.0359	16.843
tsRNA-01522	0.288092	1.92218	0.562558	8.19791	7.90024	3.41216
tsRNA-06104	9.16134	9.4031	2.97352	29.4455	17.4321	6.24353
tsRNA-03709	5.58899	5.09118	53.3627	10.2056	11.5927	6.09833
tsRNA-00278	16.8822	7.74067	42.7544	14.1372	11.3351	4.64635
tsRNA-00068	1.15237	1.55853	1.52694	14.5555	5.49582	2.75877
tsRNA-03707	12.0423	5.76654	61.4796	17.316	15.1135	5.80793
tsRNA-25682	2.13188	2.44169	0.964385	17.8179	5.75344	1.96018
tsRNA-02848	2.07426	4.36387	0.562558	18.0689	7.7285	2.61357
tsRNA-00070	0.979514	1.66243	1.76804	13.217	6.7839	3.04916
tsRNA-07587	6.39565	2.80535	2.0895	22.6697	9.2742	4.21075
tsRNA-23595	2.41998	4.10412	1.60731	22.4188	5.75344	2.25057
tsRNA-04433	2.13188	3.42876	1.92877	20.4948	6.52629	2.17797
tsRNA-06461	11.2932	10.1304	18.8859	23.5899	37.7838	18.8032
tsRNA-20202	5.99232	6.1302	9.00093	11.0421	31.8586	9.22009
tsRNA-21872	3.51473	4.05217	1.28585	23.9245	5.75344	2.03278
tsRNA-14794	1.67094	2.49364	1.92877	9.36903	12.1939	4.86414
tsRNA-05899	2.07426	1.97413	1.92877	14.7228	7.98611	3.48476
tsRNA-13526	5.47375	8.00043	4.01827	15.5593	19.9224	10.8899
tsRNA-19526	8.81563	5.03923	46.7727	13.3843	9.2742	3.26696
tsRNA-23597	2.76569	3.94826	1.28585	21.8332	5.75344	2.46837
tsRNA-10262	1.03713	0.831213	2.49133	2.50956	12.3656	7.91331
tsRNA-00065	1.44046	1.50657	1.04475	13.1334	5.75344	3.04916
tsRNA-00957	2.88092	5.09118	0.964385	19.5746	8.75896	3.33956
tsRNA-12706	2.01665	5.14313	2.49133	10.6238	15.3711	6.89692
tsRNA-04671	0.806659	3.169	0.723289	6.85947	12.1939	4.28335
tsRNA-15933	3.39949	4.93533	1.44658	25.5975	5.66757	1.81498
tsRNA-09903	3.34187	4.57167	2.00914	24.2591	7.38501	1.66978
tsRNA-07588	8.58515	3.79241	2.73243	28.2744	9.36007	4.50115
tsRNA-05996	10.9475	19.4816	2.81279	5.68834	2.40442	1.45198
tsRNA-02743	1.67094	1.40267	1.04475	12.3805	7.29914	2.32317
tsRNA-23596	2.53521	4.77948	0.964385	22.7534	5.2382	2.25057
tsRNA-00094	3.28425	4.05217	2.25023	23.5062	6.69803	2.39577
tsRNA-13528	6.74136	7.94848	3.29498	14.3045	21.8974	10.4543
tsRNA-21277	1.78617	1.97413	1.04475	13.1334	6.7839	3.48476
tsRNA-01152	3.1114	3.79241	2.0895	23.4226	5.58169	2.46837
tsRNA-12705	2.47759	4.10412	2.81279	10.5402	14.6841	6.96952
tsRNA-08255	3.1114	4.72753	3.21462	10.4565	18.5484	6.09833
tsRNA-12709	5.76185	6.90946	3.29498	16.3958	18.5484	8.3489
tsRNA-05003	2.82331	3.48071	2.97352	11.7113	14.083	6.09833
tsRNA-06460	3.16902	3.89631	2.41096	9.7873	16.0581	6.38873
tsRNA-03548	2.36236	5.03923	1.04475	18.4035	7.81437	4.13815
tsRNA-07586	1.95903	1.61048	0.642924	13.217	7.04152	1.74238
tsRNA-12708	2.30474	4.36387	3.53608	10.5402	16.144	6.82432
tsRNA-09904	3.68758	4.88338	1.92877	24.761	6.7839	2.39577
tsRNA-22778	1.72855	2.12998	1.28585	13.0497	7.55675	3.26696
tsRNA-10050	12.2727	31.0666	7.15252	9.45269	6.1828	4.35595
tsRNA-12774	3.1114	4.41582	1.52694	22.0842	7.29914	1.96018
tsRNA-13420	4.95519	2.44169	43.2366	10.0383	6.44042	3.62996
tsRNA-12771	2.1895	3.94826	0.964385	19.0727	6.44042	2.17797
tsRNA-00674	1.84379	2.80535	2.41096	19.4073	5.58169	2.61357
tsRNA-21873	3.80282	5.14313	2.16987	25.5975	7.29914	2.03278
tsRNA-19784	4.89757	7.89653	1.76804	23.9245	9.2742	7.47771
tsRNA-08669	0.74904	2.33779	1.36621	9.03443	9.8753	3.41216
tsRNA-10047	10.717	33.9758	6.2685	10.3729	6.09693	3.92035
tsRNA-13527	5.3009	8.88359	4.179	14.2209	20.6952	11.8337
tsRNA-02822	2.41998	3.3768	1.44658	18.3198	6.69803	2.83137
tsRNA-01439	0.921896	2.54559	0.321462	13.8862	5.83931	1.08899
tsRNA-10659	2.24712	3.11705	0.964385	18.0689	5.92518	2.03278
tsRNA-01373	2.13188	2.8573	1.04475	18.5708	5.40995	1.45198
tsRNA-12704	2.76569	4.88338	2.89316	10.3729	16.6592	6.67912
tsRNA-01442	2.01665	4.57167	0.160731	16.5631	7.90024	2.32317
tsRNA-00673	2.07426	3.53266	1.68767	18.9054	6.44042	2.46837
tsRNA-14328	5.24328	6.70166	4.6612	21.6659	15.1994	6.89692
tsRNA-16946	16.0179	51.9508	8.51874	29.1109	6.01105	2.54097
tsRNA-19777	1.78617	2.9612	0.401827	15.9776	3.6925	3.92035
tsRNA-19785	4.78233	7.06531	2.25023	20.8294	11.0775	7.76811
tsRNA-06459	2.88092	4.72753	3.05389	9.9546	16.0581	7.84071
tsRNA-15389	1.61332	2.18194	2.25023	15.2247	7.7285	2.39577
tsRNA-14810	2.1895	2.8573	1.68767	19.5746	5.06646	2.03278
tsRNA-02188	0.576185	1.35072	1.04475	6.94312	9.2742	2.61357
tsRNA-10748	14.9808	8.93554	21.779	9.20173	5.40995	2.68617
tsRNA-13017	1.26761	2.64949	0.723289	13.8862	6.69803	1.88758
tsRNA-04946	12.8489	5.24703	50.3891	17.4833	10.2188	4.57375
tsRNA-15580	9.79514	8.26018	5.30412	9.53634	10.734	33.686
tsRNA-04672	0.806659	3.53266	1.52694	7.77964	12.1939	4.86414
tsRNA-10264	3.28425	1.66243	6.58997	6.02295	17.9473	11.1803
tsRNA-02821	1.61332	3.22095	0.964385	17.8179	4.98059	1.88758
tsRNA-15386	2.07426	1.81828	1.36621	14.2209	6.61216	2.75877
tsRNA-10318	1.90141	1.55853	1.60731	12.4642	7.47088	3.26696
tsRNA-01371	1.78617	3.3768	1.04475	18.6544	4.98059	1.81498
tsRNA-18830	3.86044	4.20802	5.38448	2.84417	16.6592	18.8032
tsRNA-14808	2.24712	2.49364	0.964385	16.5631	5.75344	2.10538
tsRNA-19473	0.576185	1.87023	0.321462	4.51721	8.3296	5.22714
tsRNA-10660	1.49808	2.64949	1.04475	17.4833	4.29361	1.52458
tsRNA-01378	2.07426	3.42876	0.88402	17.6506	5.75344	2.25057
tsRNA-00064	1.20999	1.71438	1.36621	12.4642	6.69803	2.25057
tsRNA-12345	7.83611	9.45505	13.7425	15.141	35.5511	14.0842
tsRNA-20473	4.26377	3.84436	8.27764	3.68069	18.0332	21.1264
tsRNA-03430	0.633803	2.70144	1.60731	8.78347	10.8199	3.12176
tsRNA-20472	1.67094	1.92218	3.45571	2.34226	11.2493	13.213
tsRNA-01379	2.13188	2.9612	0.964385	17.2323	5.92518	1.74238
tsRNA-00072	1.5557	1.76633	1.44658	13.3843	6.26867	2.61357
tsRNA-08666	0.288092	1.87023	0.723289	6.69217	8.93071	2.54097
tsRNA-01443	1.61332	4.72753	0.562558	15.2247	8.67309	2.54097
tsRNA-23520	1.95903	2.33779	1.60731	14.0536	7.55675	2.90397
tsRNA-00675	1.78617	4.00021	1.12512	19.4909	4.6371	2.25057
tsRNA-04670	0.460948	2.02608	0.723289	4.1826	10.734	3.84776
tsRNA-03547	1.09475	2.33779	0.321462	11.9622	6.61216	1.37938
tsRNA-03429	0.74904	2.59754	1.28585	8.53251	10.1329	3.12176
tsRNA-15388	1.67094	1.87023	1.60731	14.0536	6.44042	2.32317
tsRNA-09348	1.38284	3.53266	3.69681	4.26626	16.2298	8.8571
tsRNA-05036	4.20615	9.76676	3.13425	12.8824	18.806	11.7611
tsRNA-04432	2.13188	3.68851	1.52694	17.9852	6.61216	2.39577
tsRNA-00676	2.59283	3.01315	0.964385	17.1487	6.1828	2.17797
tsRNA-15929	1.95903	2.75339	1.20548	17.1487	5.40995	1.66978
tsRNA-23594	3.28425	4.98728	0.88402	20.6621	7.29914	2.25057
tsRNA-19476	3.05378	3.169	1.76804	5.01913	15.0276	8.05851
tsRNA-01444	1.44046	5.19508	0.321462	15.9776	7.38501	2.83137
tsRNA-19781	3.51473	6.80556	1.92877	19.9929	8.50135	6.96952
tsRNA-07584	0.691422	1.40267	0	9.28538	4.80884	1.81498
tsRNA-12772	2.53521	3.89631	1.60731	20.6621	5.2382	2.17797
tsRNA-21871	2.93854	4.62362	1.92877	23.0043	5.2382	2.39577
tsRNA-08555	3.91806	4.67558	1.28585	21.9168	6.61216	2.75877
tsRNA-01786	2.36236	2.18194	2.0895	14.3882	8.75896	2.25057
tsRNA-15319	1.5557	2.33779	1.52694	13.3843	6.61216	3.04916
tsRNA-00069	2.53521	1.76633	1.52694	14.7228	6.26867	2.83137
tsRNA-00677	3.28425	4.00021	2.00914	21.4986	6.52629	2.17797
tsRNA-18827	4.60948	4.46777	5.22375	2.42591	15.7146	20.4004
tsRNA-10049	9.85276	30.2354	5.86668	8.19791	6.09693	4.13815
tsRNA-15387	1.38284	2.49364	1.68767	14.2209	6.01105	2.97657
tsRNA-12864	1.49808	3.32485	1.12512	11.6276	8.15786	4.13815
tsRNA-06101	6.91422	8.51994	2.97352	24.8447	13.1384	6.89692
tsRNA-08554	2.76569	4.05217	1.12512	18.0689	6.86978	2.68617
tsRNA-14795	3.1114	5.35094	3.21462	14.7228	15.2853	4.06555
tsRNA-06738	23.2202	25.0923	7.39362	13.3007	6.35454	5.22714
tsRNA-01375	2.13188	3.42876	1.12512	17.316	5.83931	2.10538
tsRNA-03529	1.67094	1.76633	1.12512	15.3083	4.55123	1.23419
tsRNA-08552	2.30474	3.58461	1.28585	18.3198	6.09693	1.74238
tsRNA-06102	8.29706	8.98749	3.29498	26.8523	15.2853	5.95313
tsRNA-01349	10.3137	15.3255	3.77718	28.3581	25.6758	6.89692
tsRNA-13529	6.79898	8.98749	3.21462	13.7189	22.0692	9.80089
tsRNA-10662	2.36236	3.94826	0.482193	17.2323	5.83931	2.25057
tsRNA-01372	1.90141	4.00021	1.36621	18.4871	5.2382	2.46837
tsRNA-16071	15.4994	22.5986	5.14339	9.87095	4.46535	2.61357
tsRNA-25161	4.83995	1.29877	34.2357	6.27391	5.06646	3.84776
tsRNA-13019	0.691422	3.0651	0.88402	12.9661	6.44042	1.66978
tsRNA-26381	13.4251	20.7803	3.85754	8.19791	3.34902	2.25057
tsRNA-01445	2.47759	3.94826	0.241096	14.9737	6.61216	3.41216
tsRNA-12510	1.95903	4.05217	2.73243	6.02295	13.9113	8.7845
tsRNA-03531	2.93854	3.48071	1.12512	18.6544	6.09693	1.81498
tsRNA-08670	0.633803	2.44169	1.52694	8.11425	9.44594	3.33956
tsRNA-20019	12.5032	4.51972	38.0129	12.6315	9.01658	3.12176
tsRNA-12343	4.43662	2.44169	4.90229	5.52104	12.7091	15.6088
tsRNA-13904	10.0256	4.36387	34.4768	9.61999	8.58722	2.54097
tsRNA-10048	10.4289	31.3783	7.63472	9.45269	7.47088	4.21075
tsRNA-02255	8.29706	4.25997	43.0759	13.217	8.93071	3.12176
tsRNA-14809	1.72855	3.42876	1.68767	17.065	6.52629	1.52458
tsRNA-08673	3.91806	4.46777	1.20548	12.4642	12.6232	4.93674
tsRNA-13495	8.58515	11.6889	8.51874	18.4871	27.2215	13.6486
tsRNA-13525	5.41614	7.89653	3.77718	13.8026	19.3212	8.9297
tsRNA-19840	14.1741	8.10433	17.6	7.61234	4.89472	2.68617
tsRNA-10484	10.1985	18.2347	3.29498	32.2897	23.7866	7.33252
tsRNA-09561	7.20231	10.2863	4.01827	16.0612	20.2658	12.3419
tsRNA-18822	1.90141	2.54559	3.93791	3.34608	9.70356	14.665
tsRNA-13991	5.99232	6.07825	0.964385	0.41826	0.429361	0.362996
tsRNA-12927	17.1703	23.1181	6.83106	9.87095	6.1828	3.84776
tsRNA-12768	2.59283	3.68851	1.36621	17.6506	6.86978	1.74238
tsRNA-00681	3.1114	3.63656	1.84841	19.4909	6.35454	2.10538
tsRNA-09187	7.25993	3.68851	41.79	13.217	7.29914	3.12176
tsRNA-04669	0.345711	1.81828	0.642924	2.50956	8.93071	5.22714
tsRNA-01376	2.1895	4.20802	1.12512	19.7419	4.46535	1.81498
tsRNA-08549	3.1114	2.8573	1.28585	16.8977	6.44042	2.17797
tsRNA-12770	2.47759	2.9612	1.68767	16.1449	6.44042	2.68617
tsRNA-01449	1.20999	3.01315	0.0803654	12.2969	6.01105	1.52458
tsRNA-06103	9.27657	8.41604	2.25023	25.5139	15.0276	5.51754
tsRNA-01438	0.864277	2.12998	0.160731	10.7911	4.03599	2.54097
tsRNA-06159	3.7452	4.31192	2.16987	21.8332	6.7839	2.03278
tsRNA-13018	1.15237	2.9612	0.562558	11.544	6.7839	2.17797
tsRNA-00291	0.115237	4.46777	24.1096	6.60852	0	2.17797
tsRNA-10045	10.8899	27.8976	5.86668	9.36903	5.83931	3.26696
tsRNA-03530	2.13188	3.48071	1.04475	16.6468	5.66757	1.88758
tsRNA-01370	2.47759	3.53266	0.803654	16.2285	6.01105	2.17797
tsRNA-13608	2.65045	3.48071	1.36621	18.0689	5.32408	2.17797
tsRNA-04021	6.79898	2.80535	51.1928	15.392	8.15786	6.02573
tsRNA-08550	1.90141	4.20802	1.52694	17.9852	5.83931	1.96018
tsRNA-08931	2.01665	2.90925	1.44658	13.0497	7.7285	2.68617
tsRNA-08672	3.22663	4.00021	0.964385	10.7911	11.5927	4.35595
tsRNA-08558	3.45711	4.57167	2.49133	21.5822	6.09693	3.04916
tsRNA-00093	1.95903	3.74046	1.20548	18.7381	4.37948	1.30678
tsRNA-01437	1.15237	2.02608	0.241096	11.0421	4.80884	1.74238
tsRNA-02376	8.23944	11.7928	4.6612	17.316	21.2104	13.8664
tsRNA-13375	5.12804	2.02608	25.074	5.43739	3.6925	1.96018
tsRNA-15390	2.70807	2.44169	2.65206	15.0574	8.41548	2.46837
tsRNA-03510	1.5557	4.10412	2.16987	3.59704	7.7285	14.665
tsRNA-13236	14.4622	21.2479	4.01827	9.28538	4.29361	2.10538
tsRNA-00067	1.84379	1.61048	1.36621	12.2132	5.58169	2.54097
tsRNA-24050	12.9642	8.51994	19.3681	9.20173	4.6371	2.61357
tsRNA-03534	2.36236	3.53266	1.20548	16.8141	5.2382	2.54097
tsRNA-13016	1.26761	2.12998	0.160731	9.87095	5.66757	2.17797
tsRNA-03808	7.14469	5.87044	2.49133	20.0765	13.0526	5.37234
tsRNA-12773	3.62996	4.51972	1.84841	19.8255	7.12739	2.61357
tsRNA-06157	2.93854	3.68851	1.76804	17.9015	6.95565	1.96018
tsRNA-07499	16.6517	25.7157	5.30412	12.1296	5.92518	2.90397
tsRNA-03546	1.20999	2.23389	0.241096	9.45269	6.35454	2.10538
tsRNA-08932	1.67094	3.11705	0.723289	11.7949	6.61216	3.12176
tsRNA-00066	1.67094	1.92218	1.76804	12.9661	6.52629	1.74238
tsRNA-24105	12.9065	5.61069	34.959	13.217	7.55675	4.13815
tsRNA-03540	0.633803	1.66243	5.30412	11.7113	9.78943	3.84776
tsRNA-01523	0.518566	2.28584	0.642924	7.02678	7.21326	3.12176
tsRNA-03643	4.14853	2.90925	0.964385	14.7228	8.07199	3.26696
tsRNA-25193	2.65045	3.2729	2.00914	19.0727	5.15233	1.66978
tsRNA-13609	2.1895	4.00021	1.76804	17.8179	5.92518	2.17797
tsRNA-02847	1.03713	2.38974	0.160731	10.1219	5.75344	1.74238
tsRNA-15804	2.47759	2.38974	1.52694	13.217	6.09693	3.77516
tsRNA-08551	2.01665	4.62362	1.04475	17.5669	5.58169	2.25057
tsRNA-00671	1.84379	2.28584	1.12512	15.141	3.95012	1.81498
tsRNA-00956	1.09475	2.54559	0.642924	9.87095	6.69803	2.39577
tsRNA-06156	2.1895	2.64949	0.642924	14.8064	4.89472	1.59718
tsRNA-05002	2.07426	2.02608	2.0895	5.60469	13.2243	3.77516
tsRNA-03509	0.921896	2.9612	1.20548	2.34226	6.01105	12.1241
tsRNA-01526	2.1895	4.25997	1.20548	11.1257	10.2188	3.77516
tsRNA-22610	2.13188	3.3768	1.12512	16.8141	4.29361	2.17797
tsRNA-10661	2.36236	3.32485	1.36621	17.4833	4.80884	1.74238
tsRNA-00672	3.05378	3.63656	1.52694	17.4833	6.26867	2.32317
tsRNA-12717	0.74904	2.12998	1.44658	6.94312	8.50135	3.41216
tsRNA-10263	2.41998	2.02608	4.50046	4.93547	14.1689	8.20371
tsRNA-08763	2.99616	4.57167	2.97352	8.36521	15.6287	5.95313
tsRNA-19593	9.62228	12.4682	4.4201	17.065	22.9279	13.939
tsRNA-10658	1.90141	2.49364	0.964385	15.392	3.43489	1.88758
tsRNA-06111	0.979514	0.987066	0.642924	9.20173	4.03599	1.81498
tsRNA-12775	3.34187	3.79241	1.76804	18.2362	6.09693	2.61357
tsRNA-01527	2.76569	4.62362	1.76804	12.3805	10.4764	4.50115
tsRNA-07583	0.864277	1.19487	0.241096	7.94695	4.89472	1.45198
tsRNA-01525	2.13188	4.51972	0.723289	12.5478	8.67309	3.04916
tsRNA-06158	2.82331	4.20802	1.44658	18.3198	5.40995	2.39577
tsRNA-10663	2.30474	4.10412	0.964385	18.3198	4.12187	1.74238
tsRNA-25684	3.86044	5.09118	2.16987	21.9168	6.01105	2.54097
tsRNA-00680	5.24328	5.24703	3.13425	23.7572	7.12739	3.55736
tsRNA-10672	4.26377	4.31192	2.0895	19.4073	7.55675	2.68617
tsRNA-08559	4.6671	3.58461	2.97352	20.5784	6.86978	3.04916
tsRNA-20051	0.115237	4.67558	22.1809	7.27773	0.0858722	1.45198
tsRNA-04957	5.3009	5.50679	0.723289	0.334608	0.429361	0.435595
tsRNA-10647	10.4289	27.482	7.95618	11.1257	6.26867	3.33956
tsRNA-14467	5.24328	9.6109	0.88402	7.02678	19.8365	10.5995
tsRNA-12703	1.5557	2.8573	2.97352	6.35756	12.0221	5.51754
tsRNA-08557	3.62996	4.67558	1.04475	18.4035	6.52629	2.32317
tsRNA-16117	5.07043	2.80535	37.7718	11.7113	6.69803	2.25057
tsRNA-03944	4.83995	2.33779	38.8165	12.1296	6.1828	2.61357
tsRNA-01446	3.45711	5.66264	1.36621	17.9015	7.38501	3.77516
tsRNA-11681	13.6556	7.74067	15.3498	8.95077	3.6925	2.25057
tsRNA-09902	2.41998	2.80535	1.52694	16.4795	4.80884	1.37938
tsRNA-11918	13.7708	4.51972	36.1644	12.6315	10.8199	3.33956
tsRNA-03512	2.36236	4.25997	3.13425	4.51721	7.90024	15.3184
tsRNA-10051	12.388	31.5342	7.23289	8.53251	8.50135	7.55031
tsRNA-06240	1.84379	1.14292	1.68767	3.34608	10.3047	5.08194
tsRNA-01151	2.01665	3.2729	1.36621	16.8977	3.60663	1.81498
tsRNA-26283	1.84379	4.93533	0.642924	11.3767	9.2742	2.97657
tsRNA-21854	8.93086	0.155853	0.160731	0	0	0
tsRNA-03532	2.47759	4.05217	1.84841	16.6468	6.44042	2.17797
tsRNA-13278	1.03713	0.779263	1.68767	1.50574	11.0775	3.70256
tsRNA-11103	0.460948	0.727312	0.401827	6.1066	3.52076	2.39577
tsRNA-16366	9.85276	3.53266	32.548	11.8786	7.04152	2.25057
tsRNA-03358	5.35852	16.1567	13.6621	4.85182	3.17727	6.09833
tsRNA-12769	2.53521	3.58461	1.52694	17.3996	4.55123	1.96018
tsRNA-03746	0.921896	2.75339	0.562558	11.1257	4.6371	1.88758
tsRNA-19780	3.97567	7.06531	1.84841	18.4035	7.21326	6.82432
tsRNA-10525	6.56851	7.37702	0.562558	3.42974	6.26867	25.1919
tsRNA-22926	6.56851	3.01315	27.2439	8.69982	4.72297	1.88758
tsRNA-03542	1.20999	1.92218	5.86668	12.4642	10.047	3.55736
tsRNA-07585	2.41998	1.61048	0.160731	10.7075	4.80884	1.88758
tsRNA-23533	21.0884	9.1953	19.6895	13.468	5.92518	4.86414
tsRNA-13607	1.72855	2.59754	1.04475	14.0536	4.37948	1.16159
tsRNA-23679	1.03713	0.987066	1.92877	0.920173	4.29361	11.6159
tsRNA-08548	1.90141	2.02608	0.803654	13.217	3.34902	1.74238
tsRNA-08553	3.28425	3.89631	2.00914	17.1487	6.1828	2.75877
tsRNA-09813	1.26761	1.50657	0.642924	7.44504	5.58169	2.61357
tsRNA-10673	4.43662	5.71459	2.00914	18.4871	9.18833	3.12176
tsRNA-21275	0.403329	1.29877	0.88402	6.35756	4.98059	2.54097
tsRNA-16241	10.0256	6.85751	16.6356	6.85947	4.46535	2.17797
tsRNA-21870	2.30474	2.90925	1.76804	16.7304	3.86425	1.59718
tsRNA-05194	6.62612	10.7538	12.2155	6.35756	2.91965	1.81498
tsRNA-04382	0.288092	0.935115	0.642924	5.27008	3.77838	3.12176
tsRNA-15385	2.24712	1.40267	1.92877	12.6315	5.49582	1.52458
tsRNA-01380	3.39949	4.67558	2.0895	19.1563	5.58169	2.68617
tsRNA-10427	2.88092	2.33779	1.84841	14.0536	5.58169	2.61357
tsRNA-01528	4.09091	6.2341	3.53608	15.3083	12.795	5.08194
tsRNA-03539	1.09475	1.50657	4.90229	8.95077	9.8753	4.13815
tsRNA-05201	5.99232	9.87066	14.7872	6.27391	3.0914	2.46837
tsRNA-12776	4.43662	4.57167	3.85754	21.6659	7.47088	2.46837
tsRNA-12702	1.61332	1.71438	2.16987	4.68452	10.5623	4.13815
tsRNA-06160	4.03329	3.89631	3.69681	20.6621	6.44042	2.46837
tsRNA-00679	4.379	4.62362	2.97352	20.5784	7.21326	2.32317
tsRNA-04431	2.24712	2.75339	1.20548	14.5555	4.20774	1.81498
tsRNA-03511	1.61332	5.03923	2.97352	3.76434	7.81437	14.665
tsRNA-10044	5.9347	17.6113	3.69681	5.52104	2.31855	2.10538
tsRNA-26065	2.07426	4.57167	1.76804	4.26626	5.2382	14.665
tsRNA-00071	2.53521	2.33779	2.00914	13.468	5.66757	2.39577
tsRNA-03030	0.864277	1.09097	0.88402	8.95077	3.60663	1.37938
tsRNA-23519	0.806659	1.35072	0.803654	6.94312	5.06646	2.17797
tsRNA-03878	16.4213	12.5202	13.3407	7.52869	9.2742	2.97657
tsRNA-13952	13.4827	7.68872	19.127	10.9584	5.15233	2.32317
tsRNA-01521	1.38284	3.58461	1.12512	9.28538	7.7285	3.04916
tsRNA-09450	1.49808	1.76633	5.62558	11.544	9.2742	3.99295
tsRNA-01742	4.55186	17.7672	2.73243	2.84417	3.34902	2.54097
tsRNA-14326	1.72855	3.11705	0.88402	10.5402	6.09693	2.75877
tsRNA-24058	4.55186	1.55853	11.0904	2.42591	1.28808	0.653392
tsRNA-04932	1.09475	0.207803	15.7516	1.924	1.28808	1.08899
tsRNA-13691	0.172855	0.519508	0.482193	6.77582	2.66204	0.580793
tsRNA-15209	3.1114	5.71459	2.65206	11.293	10.047	7.55031
tsRNA-19192	0.345711	0.519508	0.642924	5.10278	3.26314	2.46837
tsRNA-18317	0.460948	0.207803	0.241096	7.11043	1.45983	0.725992
tsRNA-05898	1.09475	1.40267	0.964385	8.11425	4.80884	2.10538
tsRNA-05876	0.345711	1.66243	0.160731	3.59704	6.61216	2.10538
tsRNA-18800	12.4456	16.0009	9.88495	9.87095	5.2382	2.17797
tsRNA-14811	3.97567	4.98728	3.77718	21.4149	7.12739	2.17797
tsRNA-14556	2.01665	1.87023	0.723289	8.19791	6.1828	2.83137
tsRNA-04594	0.288092	0.831213	0.241096	6.69217	2.83378	0.87119
tsRNA-13219	0.864277	0.415607	15.6713	1.50574	2.14681	0.653392
tsRNA-14807	1.78617	2.9612	1.04475	12.7151	5.32408	1.30678
tsRNA-25617	12.6761	18.7543	12.4566	13.1334	5.2382	2.75877
tsRNA-16556	1.95903	1.24682	0.321462	8.61617	3.86425	2.61357
tsRNA-01447	3.91806	5.9224	3.05389	17.065	9.53181	4.28335
tsRNA-12767	1.32522	2.8573	1.12512	13.5516	3.34902	1.52458
tsRNA-02823	5.18566	3.63656	3.21462	20.7457	6.61216	2.17797
tsRNA-10683	5.24328	5.97435	2.41096	18.5708	8.15786	5.22714
tsRNA-13764	9.0461	5.81849	13.5818	5.27008	3.52076	2.17797
tsRNA-17798	0.288092	0.62341	0.401827	4.26626	3.26314	2.68617
tsRNA-17105	6.16518	13.1955	20.3325	9.61999	5.66757	3.04916
tsRNA-06112	1.5557	0.987066	1.04475	8.53251	4.6371	1.88758
tsRNA-09451	2.01665	1.97413	6.18814	11.4603	9.96118	5.00934
tsRNA-05229	1.49808	1.81828	1.68767	3.34608	9.70356	4.64635
tsRNA-04922	13.4827	5.87044	19.0466	11.7113	4.72297	1.16159
tsRNA-03025	0.518566	0.571459	0.241096	6.44121	2.66204	1.01639
tsRNA-02429	8.87324	3.48071	8.35801	4.26626	1.20221	1.01639
tsRNA-03541	1.15237	1.66243	5.14339	9.7873	8.84484	4.13815
tsRNA-23727	2.41998	0.727312	7.31326	2.0913	6.26867	18.4402
tsRNA-03506	0.921896	0.363656	15.9124	1.924	1.71744	0.943789
tsRNA-10675	3.86044	6.49385	1.44658	17.3996	8.07199	3.41216
tsRNA-16555	1.09475	1.14292	0.321462	7.52869	4.03599	1.30678
tsRNA-01440	0.864277	2.28584	0.723289	9.11808	4.72297	1.66978
tsRNA-10677	4.26377	5.40289	2.41096	16.6468	9.18833	3.41216
tsRNA-23547	0.806659	1.19487	0.562558	8.28156	3.60663	0.943789
tsRNA-04436	4.20615	5.87044	4.6612	23.6735	6.35454	3.19436
tsRNA-00248	10.0832	3.48071	28.0475	8.0306	7.90024	3.99295
tsRNA-06239	0.864277	1.09097	1.44658	2.92782	7.81437	3.77516
tsRNA-03428	0.518566	1.40267	1.36621	4.68452	7.12739	2.46837
tsRNA-04831	3.16902	5.76654	8.11691	2.84417	1.28808	0.435595
tsRNA-18821	2.1895	1.66243	2.57169	2.0913	7.55675	10.3817
tsRNA-01785	1.03713	1.03902	1.04475	6.52486	5.06646	2.32317
tsRNA-23603	4.379	5.29899	2.25023	18.989	6.7839	3.12176
tsRNA-13015	1.15237	3.169	0.241096	9.20173	5.15233	2.32317
tsRNA-00683	4.89757	4.98728	3.05389	20.5784	7.7285	2.10538
tsRNA-10676	4.72471	5.55874	2.3306	18.4035	8.15786	3.33956
tsRNA-16397	1.26761	0.467558	15.0283	2.25861	1.5457	0.653392
tsRNA-10664	3.1114	4.31192	2.73243	18.6544	4.72297	2.68617
tsRNA-02187	1.03713	1.14292	0.88402	8.69982	3.6925	1.30678
tsRNA-03535	4.09091	3.68851	3.13425	18.4035	6.09693	2.68617
tsRNA-12521	1.5557	2.02608	4.82193	10.5402	9.18833	3.41216
tsRNA-13955	1.15237	0.363656	14.2247	1.58939	1.45983	0.943789
tsRNA-22776	1.03713	1.14292	1.04475	6.44121	5.2382	2.25057
tsRNA-08762	1.44046	1.71438	2.3306	4.51721	9.96118	3.62996
tsRNA-07845	1.15237	2.12998	4.09864	6.69217	10.3047	4.35595
tsRNA-16554	1.09475	0.987066	0.0803654	7.19408	3.52076	0.943789
tsRNA-04012	5.07043	2.38974	9.48312	5.10278	18.806	12.0515
tsRNA-06863	0.0576185	1.81828	18.0822	5.18643	0.0858722	1.08899
tsRNA-04883	7.60564	2.38974	29.0119	10.1219	6.44042	1.96018
tsRNA-02742	0.806659	1.45462	0.803654	6.52486	4.29361	2.68617
tsRNA-03538	0.806659	1.76633	3.37535	7.8633	7.47088	3.48476
tsRNA-10847	0.115237	0.571459	0.241096	4.1826	2.74791	1.74238
tsRNA-20822	2.93854	2.90925	1.68767	14.3882	4.80884	2.25057
tsRNA-03724	4.09091	1.81828	26.1991	7.69599	4.46535	1.81498
tsRNA-01377	4.60948	4.72753	3.45571	21.4986	5.75344	2.39577
tsRNA-05196	7.31755	9.87066	12.7781	7.27773	2.91965	2.39577
tsRNA-15354	1.03713	0.779263	0.803654	1.58939	7.04152	3.84776
tsRNA-21853	1.26761	2.23389	0.964385	8.61617	5.40995	2.03278
tsRNA-03806	3.51473	3.0651	1.68767	10.4565	8.93071	3.19436
tsRNA-10680	4.60948	5.97435	2.3306	16.6468	9.2742	3.84776
tsRNA-04792	1.15237	2.07803	0.241096	4.34991	7.29914	2.46837
tsRNA-08979	1.32522	1.50657	2.57169	10.4565	4.89472	2.32317
tsRNA-18390	0.576185	0.883164	0.160731	7.52869	2.40442	0.290397
tsRNA-23831	1.03713	0.883164	0.401827	3.09513	6.35454	2.32317
tsRNA-06458	1.67094	2.02608	1.84841	3.76434	10.1329	3.99295
tsRNA-03027	0.576185	0.571459	0.401827	7.02678	2.57617	0.435595
tsRNA-16888	1.61332	2.90925	5.46485	10.2892	10.3047	4.57375
tsRNA-06844	4.83995	2.38974	27.3243	7.02678	6.7839	1.96018
tsRNA-20553	0.691422	0.519508	0.321462	4.60087	2.74791	2.61357
tsRNA-15318	1.09475	1.35072	0.964385	7.02678	4.46535	2.39577
tsRNA-01630	0.172855	0.311705	0.160731	5.77199	1.37396	0.508194
tsRNA-11875	9.27657	3.169	11.0101	5.85565	1.88919	0.943789
tsRNA-04489	10.0832	12.9877	4.98266	7.77964	2.06093	1.74238
tsRNA-15355	1.15237	0.831213	1.12512	2.42591	7.38501	3.41216
tsRNA-13384	7.08707	2.07803	19.2877	6.02295	4.03599	1.81498
tsRNA-06914	0.518566	0.415607	0.482193	7.02678	1.80332	0.725992
tsRNA-06343	0.345711	0.415607	0.0803654	6.1066	1.5457	0.435595
tsRNA-16886	1.67094	1.92218	5.78631	9.87095	9.70356	4.35595
tsRNA-02636	1.15237	1.45462	0.803654	8.11425	3.86425	1.74238
tsRNA-07484	0.518566	1.40267	0.321462	7.27773	3.34902	0.725992
P, patients; N, healthy participants; TPM, transcript per million; tsRNA, tRNA-derived small RNA.
